# Supplementary material for: Estimation of the metabolic stability of omipalisib in human liver microsomes employing an ultra-fast UPLC-MS/MS approach: in silico screening for structural alarms and metabolic lability
Source: Royal Society of Chemistry journal article supplement (doi:10.1039/d5ay01676b), 2026-01-01
Supplement: d5ay01676b1.pdf [file d5ay01676b1.pdf]

## **Supplementary information**

### **Estimation of omipalisib metabolic stability in the human liver microsomes employing ultra-fast UPLC-MS/MS approach: Greenness evaluation with the in-silico study for structural alarms and metabolic lability**

Mohamed W. Attwa \*, Awadh M. Ali, Ali S. Abdelhameed, Adnan A. Kadi

Department of Pharmaceutical Chemistry, College of Pharmacy, King Saud University, P.O. Box  
2457, Riyadh 11451, Saudi Arabia.

Mohamed W. Attwa: <https://orcid.org/0000-0002-1147-4960>

Awadh M. Ali: <https://orcid.org/0009-0004-6410-5909>

Ali S. Abdelhameed: <https://orcid.org/0000-0002-5910-2832>

Adnan A. Kadi: <https://orcid.org/0000-0001-8115-4228>

\*Correspondence to:

Dr. Mohamed W. Attwa

Fax: +966 1146 76 220

Tel.: +966 1146 70237

E-mail: [mzeidan@ksu.edu.sa](mailto:mzeidan@ksu.edu.sa)

## In-silico ADME profiling of OMP

The ADME characteristics of OMP were calculated using its SMILES representation COC1=C(C=C(C=N1)C2=CC3=C(C=CN=C3C=C2)C4=CN=NC=C4)NS(=O)(=O)C5=C(C=C(C=C5)F)F on the SwissADME platform. An evaluation was conducted to examine the tendency of OMP to exhibit drug-like characteristics by examining its ADME properties. The log p score generated by the SwissADME procedure suggests that OMP exhibits a moderate degree of water solubility (Log S = -5.42). The expected pharmacokinetic profile for GIT absorption reveals minimal absorption; though, permeability across the blood-brain barrier is not yet recognized. The valuation of drug similarity meets the criteria set forth by Lipinski (one violation: MW>500), Veber, and Muegge <sup>1, 2</sup>; however, it does not conform to the Ghose recommendations (two violations: MW>480, WLOGP>5.6) and the Egan criteria (one violation: WLOGP>5.88) <sup>3</sup>. The proposed bioavailability score is 0.55. The Log Kp mark, indicative of skin permeability, is computed at -7.03 cm/s. The suggested mechanism of OMP action comprises the inhibition of specific CYP450 sub enzymes, namely CYP2D6, CYP2C9, and CYP3A4, as well as P-glycoprotein, that functions as a substrate. The statement indicates that EST does not show inhibitory effects on other CYP450 sub enzymes, comprising CYP2C19 and CYP1A2. Fig. 2 exhibits the ADME radar map for OMP, with applicable data listed in Table 1.

## Figures:

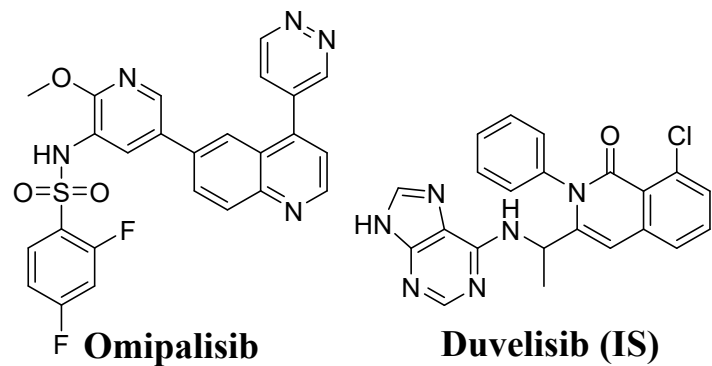

Molecular Weight: 505.50      Molecular Weight: 416.87

**Fig. S1.** The chemical structure of omipalisib and duvelisib (IS).

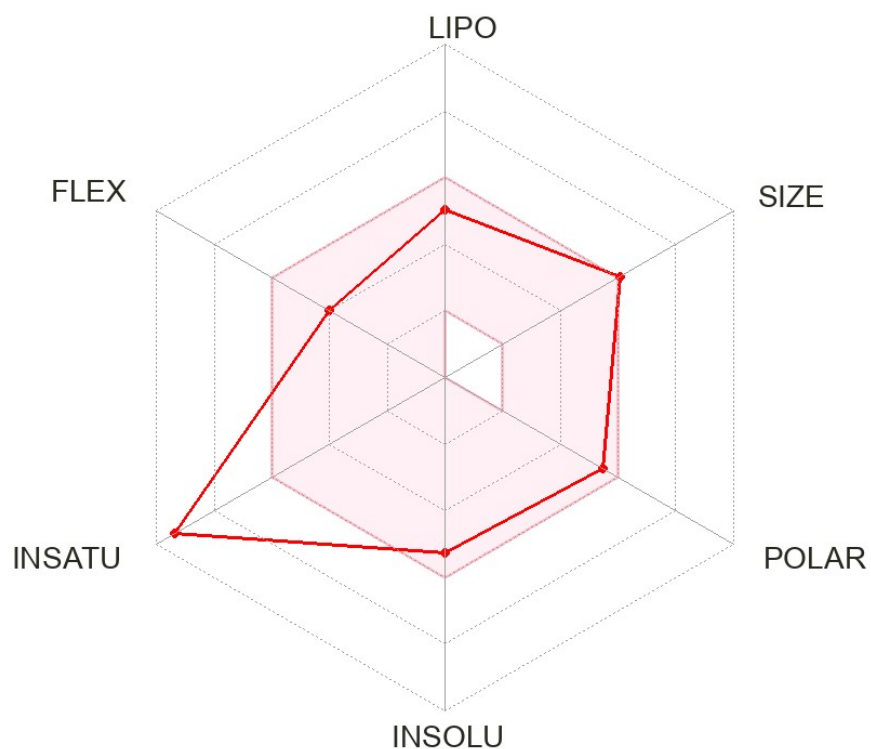

**Fig. S2.** Saturation (INSATU): carbons fraction in  $sp^3$  hybridization 0.04; Molecular weight (SIZE): 505.50 g/mol; Polarity (POLAR): TPSA 115.34 Å<sup>2</sup>; Flexibility (FLEX): Solubility (INSOLU):  $\log S \leq 10.61$ ; 6 rotatable bonds. Lipophilicity (LIPO) is determined as XLOGP3 = +3.32. The OMP ADME radar chart was done applying the in-silico SwissADME online software.

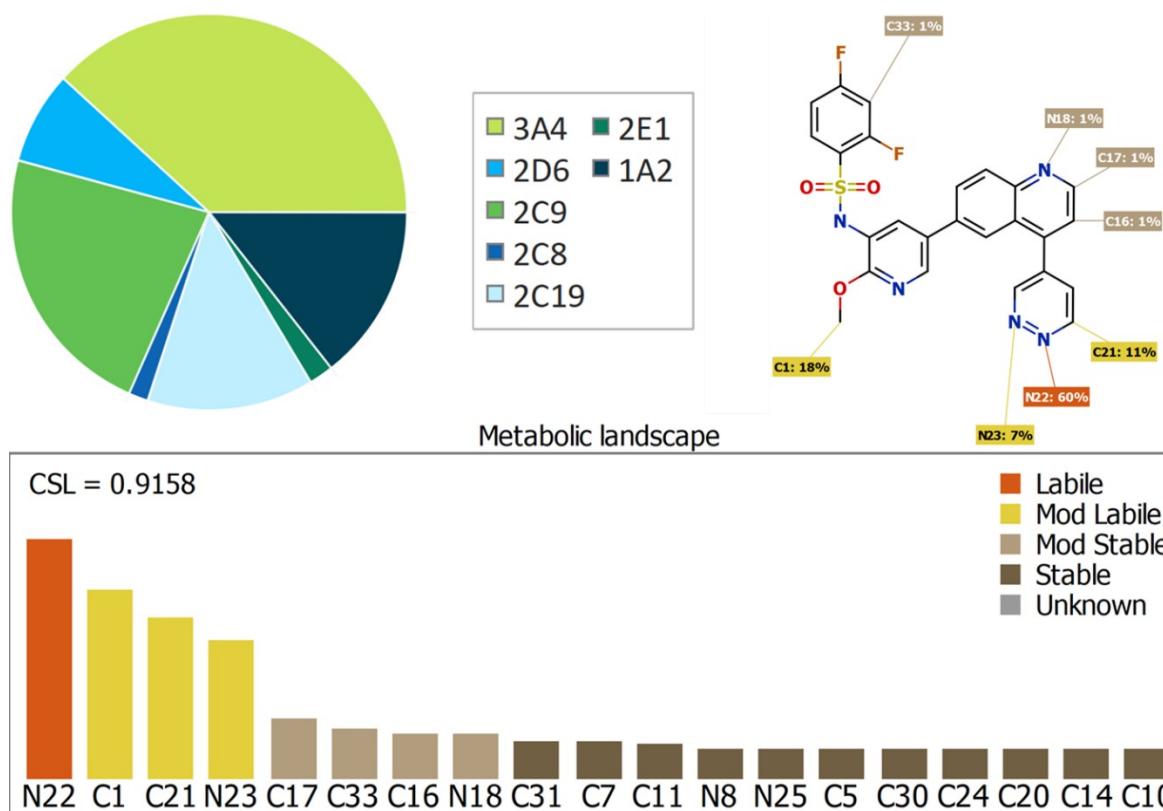

**Fig. S3.** The CSL value of 0.9158 designates that OMP displays a high susceptibility to metabolism. The outcomes were estimated applying the P450 software.

**DVS MRM RT45**

DVS MRM RT45

MRM of 2 Channels ES+  
TIC (DUVELISIB 2)  
1.24e7

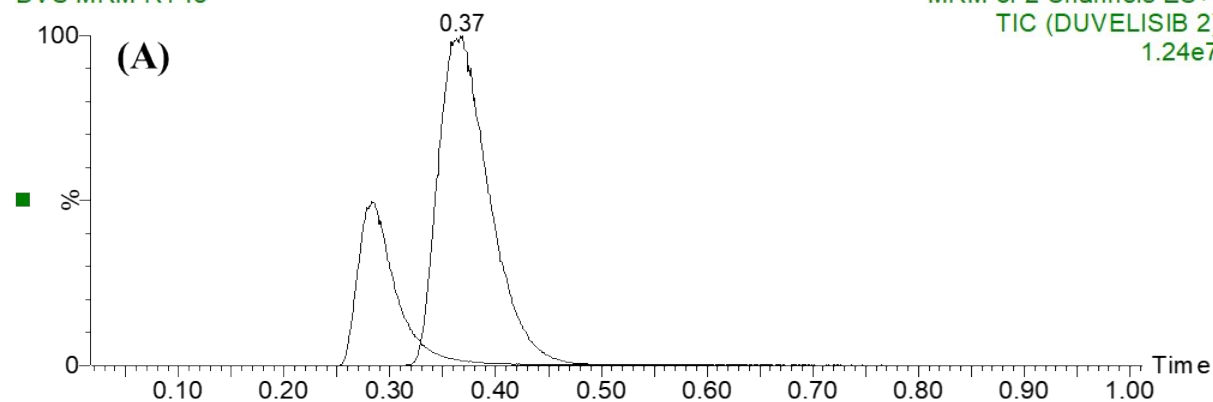

**OMP MRM RT2**

OMP MRM RT2

MRM of 2 Channels ES+  
TIC (OMP-MRM)  
6.63e6

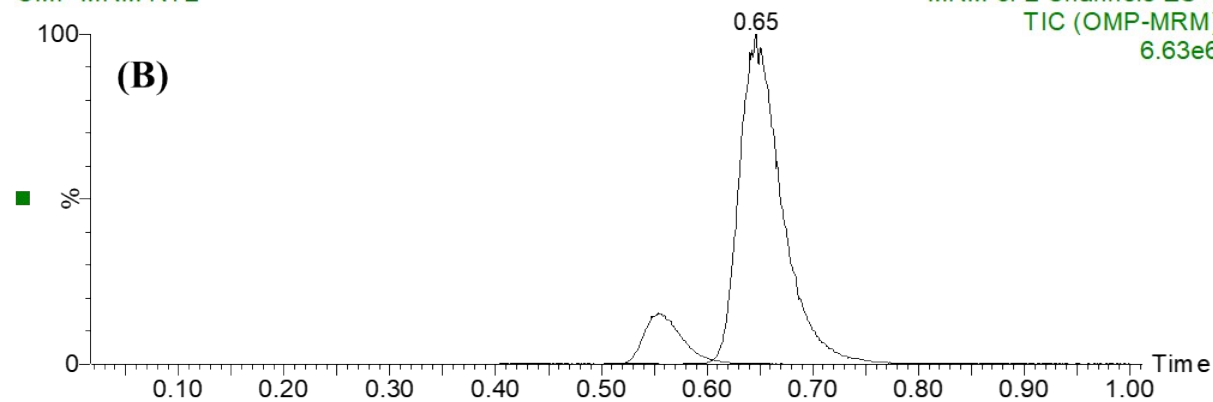

**OMP MRM RT2**

OMP MRM RT2

MRM of 2 Channels ES+  
TIC (OMP-MRM)  
8.23e6

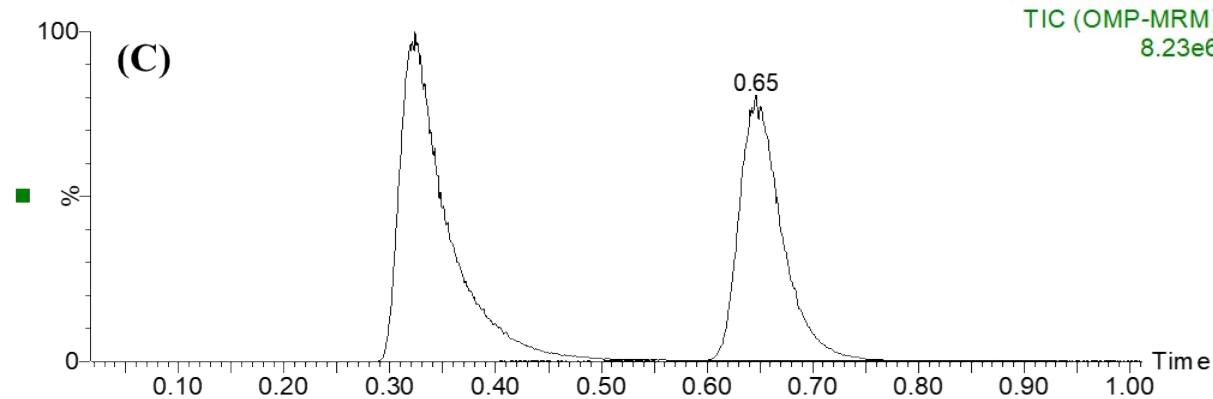

**Fig. S4.** Chromatographic separation of OMP and DUV using HILIC DIOL column (A), imidazole column (B) and Eclipse Plus C8 column (C).

### OMP MRM

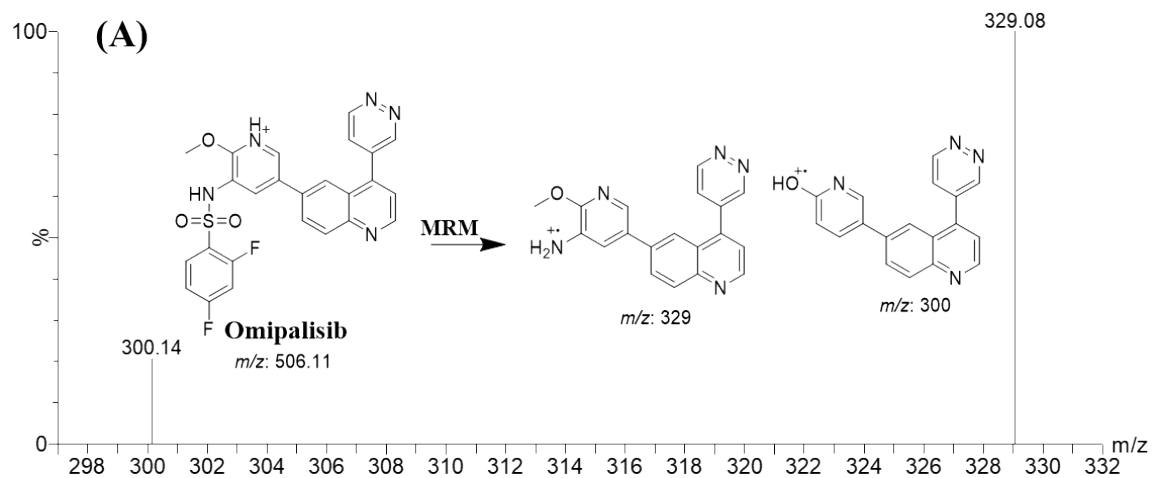

### DUV MRM

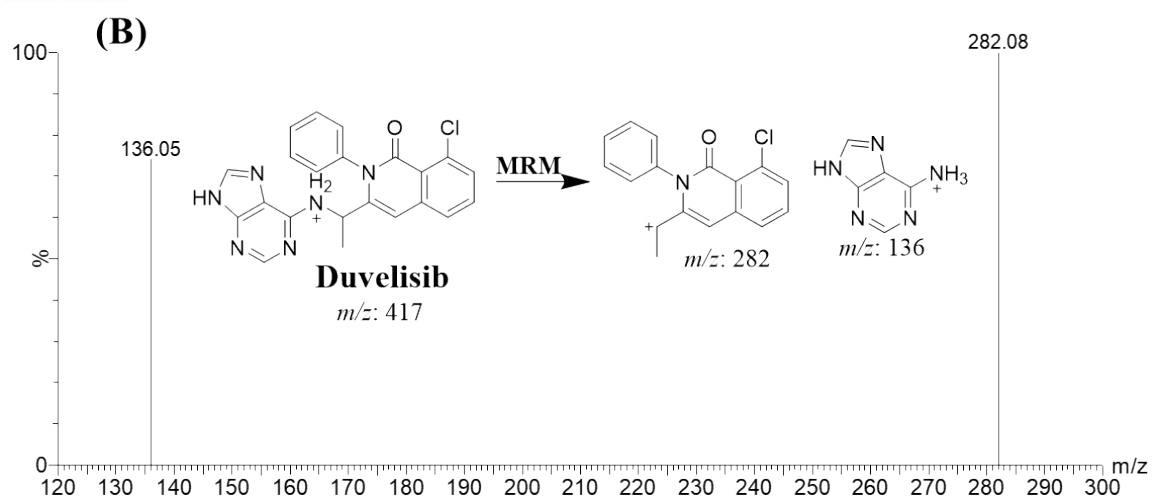

**Fig. S5.** MS spectrum of OMP (A) and MS spectrum of DUV as IS (B) attained applying MRM mass detector mode. The proposed fragmentation patterns are displayed.

**Small structural changes in the pyridazine ring and methoxy group or replacement of the group could improve the omipalisib metabolic stability**

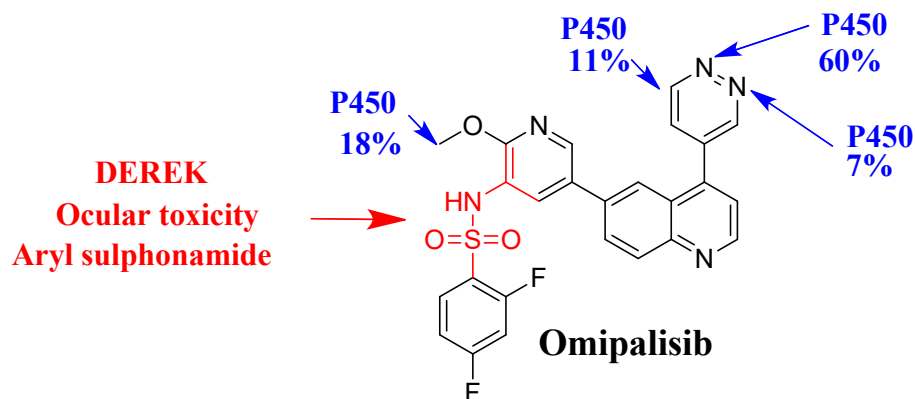

**Fig. S6.** The OMP structure displaying the WhichP450 metabolic locations marked in blue color that the pyridazine ring and methoxy group (marked in blue color) are accountable for OMP's metabolic lability, although OMP DEREK alert predictions (red color) reveal that Aryl sulphonamide moiety is anticipated for ocular toxicity.



## Tables:

**Table S1.** The ADME features of omipalisib were assessed applying the SwissADME tool that is freely accessible.

| Physicochemical characteristics |                                                                                | Water Solubility         |                                           |
|---------------------------------|--------------------------------------------------------------------------------|--------------------------|-------------------------------------------|
| Heavy atoms num.                | 36                                                                             | Solubility               | 2.87e-03 mg/mL; 5.69 <sup>-6</sup> mol/L  |
| Formula                         | C <sub>25</sub> H <sub>17</sub> F <sub>2</sub> N <sub>5</sub> O <sub>3</sub> S | Log S (ESOL)             | -5.25                                     |
| Rotatable bonds num.            | 6                                                                              | Class                    | Moderately soluble                        |
| Molecular weight                | 505.50 g/mol                                                                   | Solubility               | 1.93e-03 mg/mL; 3.82 <sup>-6</sup> mol/L  |
| Num. of arom. heavy atoms       | 28                                                                             | Log S (Ali)              | -5.42                                     |
| Fraction Csp <sup>3</sup>       | 0.04                                                                           | Class                    | Moderately soluble                        |
|                                 |                                                                                | Solubility               | 1.23e-08 mg/mL; 2.44 <sup>-11</sup> mol/L |
| Num. of H-bond donors           | 1                                                                              | Class                    | Insoluble                                 |
| Num. of H-bond acceptors        | 9                                                                              | Log S (SILICOS-IT)       | -10.61                                    |
| TPSA                            | 115.34 Å <sup>2</sup>                                                          | Medicinal Chemistry      |                                           |
| Molar Refractivity              | 129.52                                                                         | Leadlikeness             | No; 1 violation: MW>350                   |
| Lipophilicity                   |                                                                                | Synthetic accessibility  | 3.57                                      |
| Log Po/w (XLOGP3)               | 3.32                                                                           | Brenk                    | 0 alert                                   |
| Log Po/w (WLOGP)                | 6.57                                                                           | PAINS                    | 0 alert                                   |
| Log Po/w (iLOGP)                | 3.08                                                                           | Pharmacokinetics         |                                           |
| Log Po/w (MLOGP)                | 2.67                                                                           | P-gp substrate           | No                                        |
| Log Po/w (SILICOS-IT)           | 4.28                                                                           | GI absorption            | Low                                       |
| Consensus Log Po/w              | 3.98                                                                           | Permeant to BBB          | No                                        |
| Druglikeness                    |                                                                                | CYP2D6 inhibition        | Yes                                       |
| Ghose                           | No; 2 violations: LOGP>5.6, MW>480                                             | CYP1A2 inhibition        | No                                        |
| Lipinski                        | Yes; 1 violation: MW>500                                                       | Skin permeation (Log Kp) | -7.03 cm/s                                |
| Egan                            | No; 1 violation: WLOGP>5.88                                                    | CYP2C19 inhibition       | No                                        |
| Muegge                          | Yes                                                                            | CYP2C9 inhibition        | Yes                                       |
| The score of bioavailability    | 0.55                                                                           | CYP3A4 inhibition        | Yes                                       |
| Veber                           | Yes                                                                            |                          |                                           |

**Table S2.** The twelve characteristics of the greenness assessment of the UPLC-MS/MS methodology.

| <b>Standards</b>                                                                                                                                            | <b>Mark</b> | <b>Weight</b> |
|-------------------------------------------------------------------------------------------------------------------------------------------------------------|-------------|---------------|
| 1. Utilize straight approaches of analysis to circumvent the necessity for sample treatment.                                                                | 0.3         | 2             |
| 2. The targets are to accomplish a low size of sample and just the right samples number.                                                                    | 0.75        | 2             |
| 3. Whenever feasible, it is advisable to conduct observations on site.                                                                                      | 0.0         | 2             |
| 4. The integration of operational procedures and analytical approaches lead to conserving energy and a reduction in reagent usage.                          | 1.0         | 2             |
| 5. One should choose automated and miniaturized approaches.                                                                                                 | 0.5         | 2             |
| 6. Avoidance of derivatization is recommended.                                                                                                              | 1.0         | 2             |
| 7. It is important to prevent the beginning of a considerable analytical waste volume and verification that suitable measures are in place for its control. | 0.79        | 2             |
| 8. Methods that analyze many analytes or parameters simultaneously are favored over methods that analyze one analyte at a time.                             | 1.0         | 2             |
| 9. Energy consumption should be reduced.                                                                                                                    | 0.0         | 2             |
| 10. It is sensible to arrange reagents that are originated from natural resources.                                                                          | 0.5         | 2             |
| 11. It is important to remove or substitute toxic reagents.                                                                                                 | 0.8         | 2             |
| 12. The level of safety for operators should be enhanced.                                                                                                   | 0.6         | 2             |

## References

1. I. Muegge, *Medicinal Research Reviews*, 2003, **23**, 302-321.
2. M. Motiwale, H. Verma, O. Silakari and B. Sapra, *Computational Drug Delivery: Molecular Simulation for Pharmaceutical Formulation*, 2024, 39.
3. M. W. Attwa, A. S. Abdelhameed and A. A. Kadi, *Medicina*, 2024, **60**, 1914.
